# Supplementary material for: Activating peroxymonosulfate by halogenated and methylated quinones: performance and mechanism
Source: Royal Society of Chemistry journal article supplement (doi:10.1039/c9ra04789a), 2019-01-01
Supplement: c9ra04789a1.pdf [file c9ra04789a1.pdf]

## Supporting Information

### **Activating peroxymonosulfate by halogenated and methylated benzoquinones: Performance and mechanism**

Hong Zhang<sup>a,b</sup>, Lina Qiao<sup>b</sup>, Jing He<sup>a,b</sup>, Na Li<sup>a,b</sup>, Dongmei Zhang<sup>a,b</sup>, Kai Yu<sup>a,b</sup>, Hong You<sup>a,b</sup>, Jie Jiang<sup>a,b\*</sup>

<sup>a</sup> School of Marine Science and Technology, Harbin Institute of Technology at Weihai, Weihai, Shandong 264209, P. R. China

<sup>b</sup> State Key Laboratory of Urban Water Resource and Environment, Harbin Institute of Technology, Harbin, Heilongjiang 150090, P. R. China

\*Correspondence to: Jie Jiang; E-mail: [jiejiang@hitwh.edu.cn](mailto:jiejiang@hitwh.edu.cn);

Fax: +(86)-631-5685-359;

## TABLE OF CONTENTS

|                                                                                                     |    |
|-----------------------------------------------------------------------------------------------------|----|
| Fig. S1. Photograph of DSI-MS .....                                                                 | 3  |
| Fig. S2. Experimental setup.....                                                                    | 3  |
| Fig. S3. pH variation in experiment of pH 10. ....                                                  | 4  |
| Fig. S4. Residual PMS after the degradation of SMX under different pH. ....                         | 4  |
| Fig. S5. Effect of scavengers on SMX degradation. ....                                              | 5  |
| Fig. S6. Degradation of BA in PMS/different quinones system.....                                    | 5  |
| Fig. S7. Theoretical simulation and detected isotopic envelope of $m/z$ 180.98. ....                | 6  |
| Fig. S8. Theoretical simulation and detected isotopic envelope of $m/z$ 89.98. ....                 | 6  |
| Fig. S9. MS/MS results of $m/z$ 180.98 and 89.98. ....                                              | 7  |
| Fig. S10. Theoretical simulation and detected isotopic envelope of $m/z$ 168.04. ....               | 7  |
| Fig. S11. Intermediates identification in PMS activated by DCBQ. ....                               | 8  |
| Fig. S12. Intermediates identification in PMS activated by TFBQ. ....                               | 8  |
| Table S1. The chemical characteristics of quinones. ....                                            | 9  |
| Table S2. Pseudo-first-order rate constants for SMX degradation. ....                               | 9  |
| Table S3. Rate constant of selected quenchers with $^1O_2$ , $\cdot OH$ and $SO_4^{\cdot -}$ . .... | 9  |
| Table S4. Identified products of PMS activated by DMBQ derived from Figure 5a. ....                 | 10 |
| Table S5. Identified products of PMS activated by DCBQ derived from Figure 5b. ....                 | 10 |
| Table S6. Identified products of PMS activated by TFBQ derived from Figure 5c. ....                 | 10 |

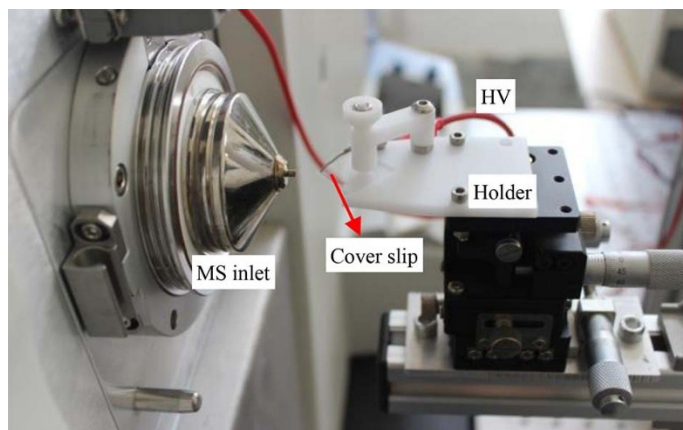

**Fig. S1.** Photograph of droplet spray ionization mass spectrometry (DSI-MS).

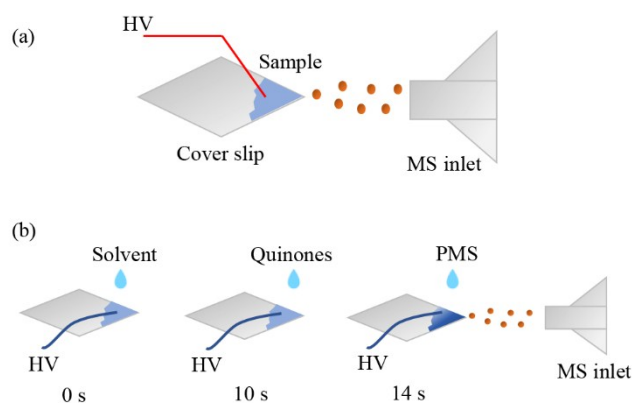

**Fig. S2.** Experimental setup. (a) Schematic of DSI-MS; (b) workflow of in situ analysis and real-time monitoring of PMS activated by different quinines (DMBQ, DCBQ, and TFBQ). The slip tip-end was 5 mm from the MS inlet. The angle between the corner and the MS inlet was 4 °.

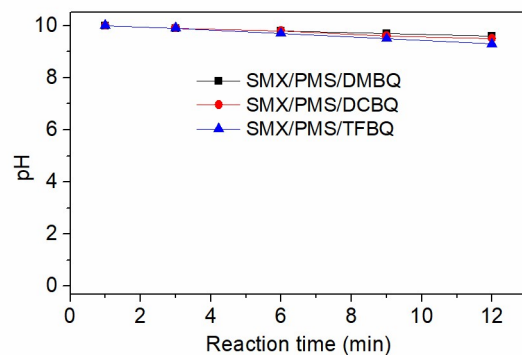

**Fig. S3.** pH variation in experiment of pH 10.

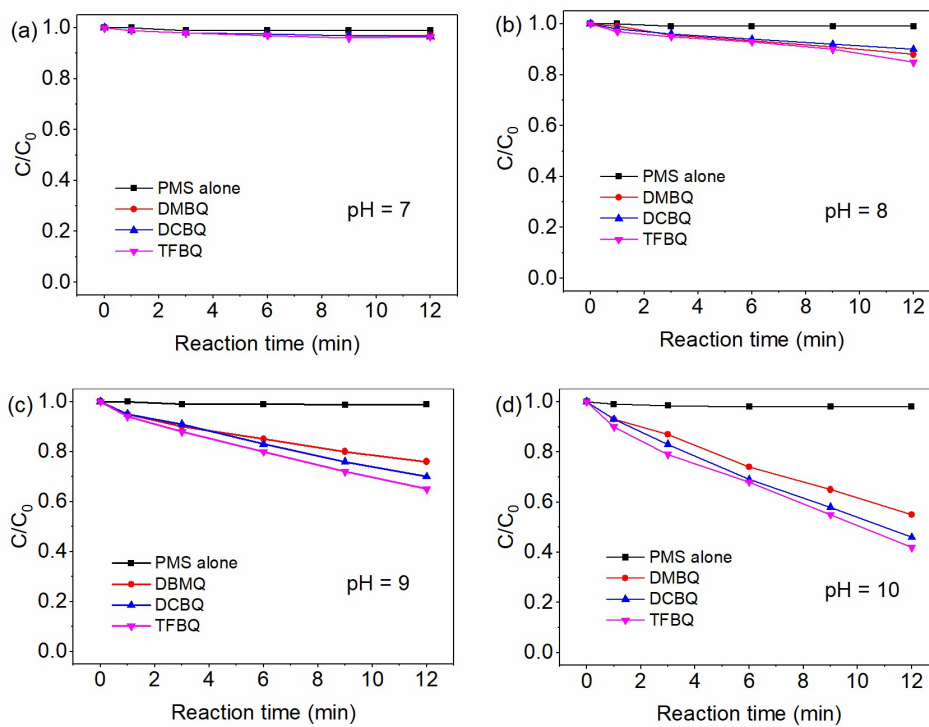

**Fig. S4.** Residual PMS after the degradation of SMX under different pH. (a) 7; (b) 8; (c) 9; (d) 10.

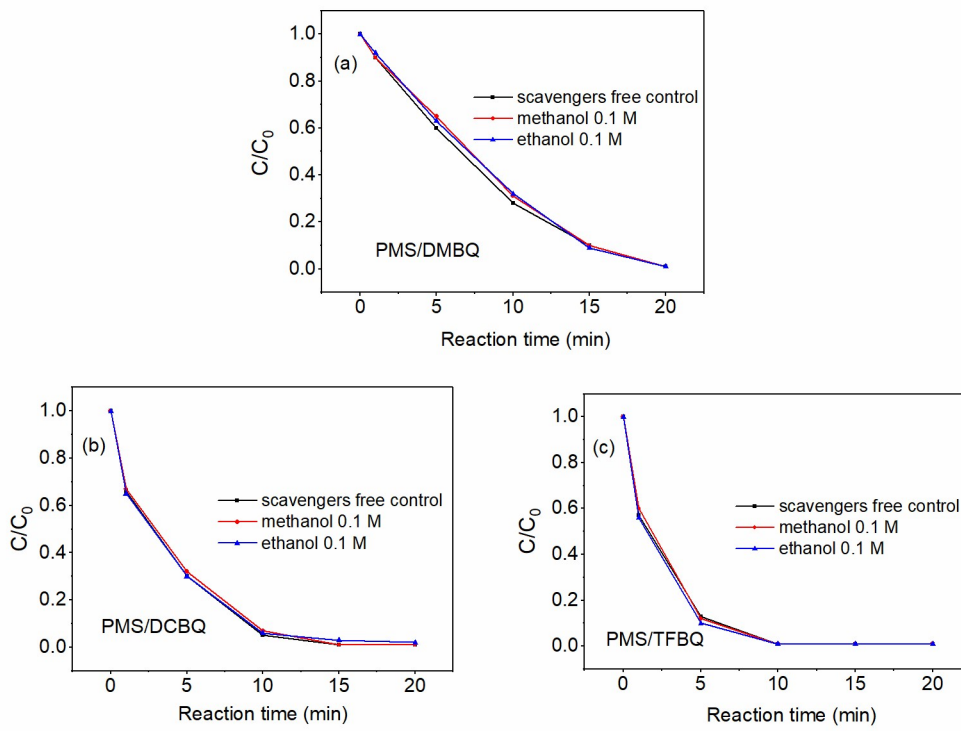

**Fig. S5.** Effect of scavengers on SMX degradation. (a) DMBQ; (b) DCBQ; (c) TFBQ.

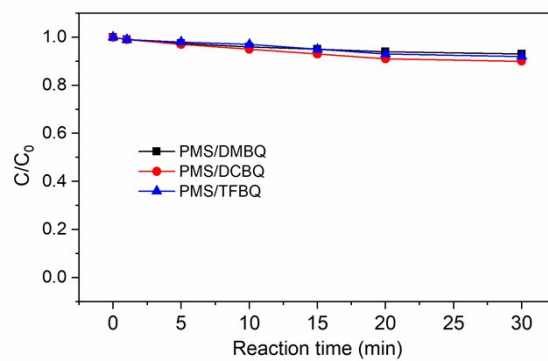

**Fig. S6.** Degradation of BA in PMS/different quinones system.

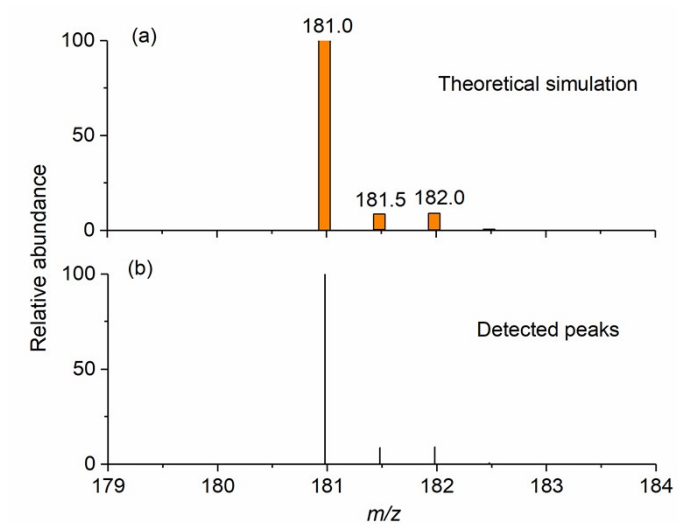

**Fig. S7.** Theoretical simulation and detected isotopic envelope of  $m/z$  180.98.

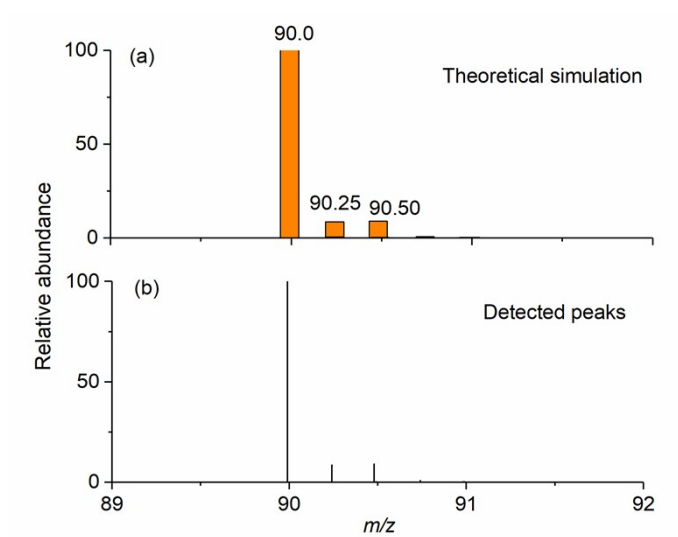

**Fig. S8.** Theoretical simulation and detected isotopic envelope of  $m/z$  89.98.

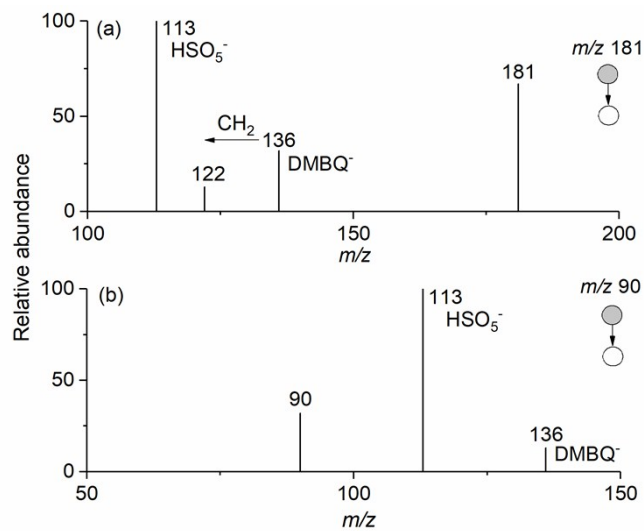

**Fig. S9.** MS/MS results of (a)  $m/z$  180.98 and (b) 89.98.

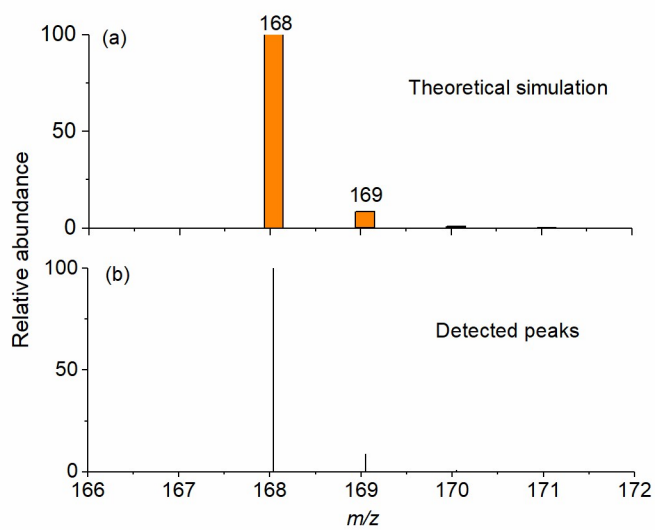

**Fig. S10.** Theoretical simulation and detected isotopic envelope of  $m/z$  168.04.

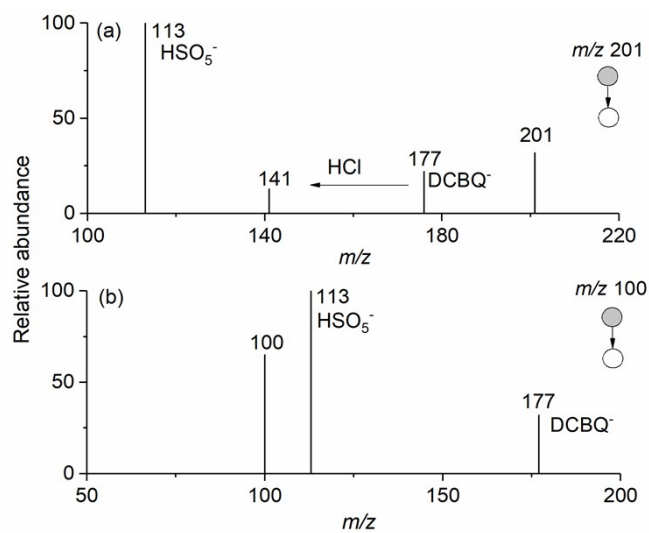

**Fig. S11.** Intermediates identification in PMS activated by DCBQ.

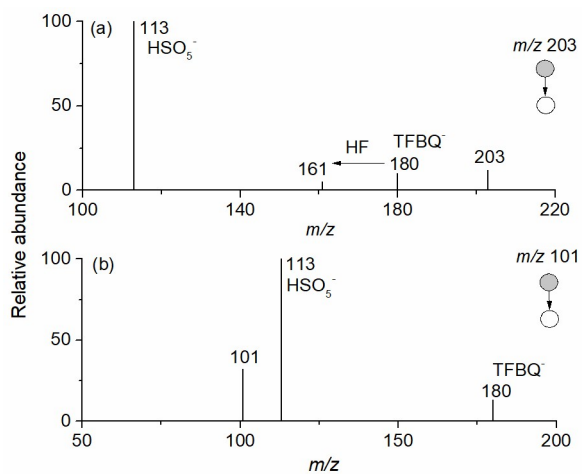

**Fig. S12.** Intermediates identification in PMS activated by TFBQ.



**Table S1.** The chemical characteristics of quinones.

| Compound                      | Structure                                                                         | Molecular formula                                            | Molecular mass |
|-------------------------------|-----------------------------------------------------------------------------------|--------------------------------------------------------------|----------------|
| 2,6-dimethyl-1,4-benzoquinone | 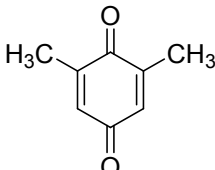 | C <sub>6</sub> H <sub>6</sub> O <sub>4</sub>                 | 136.05         |
| 2,6-dichloro-1,4-benzoquinone |  | C <sub>6</sub> H <sub>2</sub> O <sub>2</sub> Cl <sub>2</sub> | 175.94         |
| tetrafluoro-1,4-benzoquinone  |  | C <sub>6</sub> O <sub>2</sub> F <sub>4</sub>                 | 179.98         |

**Table S2.** Pseudo-first-order rate constants for SMX degradation.

| BQs  | pH = 7                         | pH = 8                         | pH = 9                         | pH = 10                        |
|------|--------------------------------|--------------------------------|--------------------------------|--------------------------------|
|      | $k_{obs}$ (min <sup>-1</sup> ) |
| DMBQ | 0.0101                         | 0.0136                         | 0.074                          | 0.0958                         |
| DCBQ | 0.0185                         | 0.0382                         | 0.2310                         | 0.3054                         |
| TFBQ | 0.0277                         | 0.0702                         | 0.3042                         | 0.6323                         |

**Table S3.** Rate constant of selected quenchers with <sup>1</sup>O<sub>2</sub>, ·OH and SO<sub>4</sub><sup>·-</sup>.

| quenchers        | reaction rate constant (M <sup>-1</sup> s <sup>-1</sup> ) |                        |                             |
|------------------|-----------------------------------------------------------|------------------------|-----------------------------|
|                  | SO <sub>4</sub> <sup>·-</sup>                             | ·OH                    | <sup>1</sup> O <sub>2</sub> |
| methanol         | 2.5×10 <sup>7</sup>                                       | 9.7×10 <sup>8</sup>    | --                          |
| ethanol          | 1.0 × 10 <sup>7</sup>                                     | 1.0 × 10 <sup>9</sup>  | --                          |
| NaN <sub>3</sub> | 2.5 × 10 <sup>9</sup>                                     | 1.2 × 10 <sup>10</sup> | 1.0 × 10 <sup>9</sup>       |

**Table S4.** Identified products of PMS activated by DMBQ derived from Figure 5a.

| Compound          | Molecular formula                                | Assignment                  | Theoretical $m/z$ | Measured $m/z$ | Mass Diff. (ppm) |
|-------------------|--------------------------------------------------|-----------------------------|-------------------|----------------|------------------|
| bisulfate         | $\text{HSO}_4^-$                                 | $\text{M}^-$                | 96.9590           | 96.9592        | 2.1              |
| peroxymonosulfate | $\text{HSO}_5^-$                                 | $\text{M}^-$                | 112.9539          | 112.9542       | 2.6              |
| DMBQ              | $\text{C}_8\text{H}_8\text{O}_2$                 | $\text{M}^-$                | 136.0519          | 136.0522       | 2.2              |
| Hydro-DMBQ        | $\text{C}_8\text{H}_{10}\text{O}_2$              | $[\text{M}-\text{H}]^-$     | 137.0597          | 137.0600       | 2.2              |
| DMBQ-OH           | $\text{C}_8\text{H}_8\text{O}_3$                 | $[\text{M}-\text{H}]^-$     | 151.0390          | 151.0393       | 2.0              |
| Intermediate I    | $\text{C}_8\text{H}_{12}\text{O}_{12}\text{S}_2$ | $[\text{M}-2\text{H}]^{2-}$ | 180.9801          | 180.9803       | 1.1              |
| Intermediate II   | $\text{C}_8\text{H}_{12}\text{O}_{12}\text{S}_2$ | $[\text{M}-4\text{H}]^{4-}$ | 89.9859           | 89.9862        | 3.3              |
| Intermediate III  | $\text{C}_8\text{H}_8\text{O}_4$                 | $\text{M}^-$                | 168.0417          | 168.0420       | 1.8              |

**Table S5.** Identified products of PMS activated by DCBQ derived from Figure 5b.

| Compound         | Molecular formula                                        | Assignment                  | Theoretical $m/z$ | Measured $m/z$ | Mass Diff. (ppm) |
|------------------|----------------------------------------------------------|-----------------------------|-------------------|----------------|------------------|
| DCBQ             | $\text{C}_6\text{H}_2\text{O}_2\text{Cl}_2$              | $\text{M}^-$                | 175.9426          | 175.0429       | 1.7              |
| Hydro-DCBQ       | $\text{C}_6\text{H}_4\text{O}_2\text{Cl}_2$              | $[\text{M}-\text{H}]^-$     | 176.9505          | 176.9508       | 1.6              |
| Intermediate I   | $\text{C}_6\text{H}_6\text{O}_{12}\text{S}_2\text{Cl}_2$ | $[\text{M}-2\text{H}]^{2-}$ | 200.9255          | 200.9257       | 1.0              |
| Intermediate II  | $\text{C}_6\text{H}_6\text{O}_{12}\text{S}_2\text{Cl}_2$ | $[\text{M}-4\text{H}]^{4-}$ | 99.9586           | 99.9588        | 2.0              |
| Intermediate III | $\text{C}_6\text{H}_2\text{O}_4\text{Cl}_2$              | $\text{M}^-$                | 207.9325          | 207.0328       | 1.4              |

**Table S6.** Identified products of PMS activated by TFBQ derived from Figure 5c.

| Compound         | Molecular formula                                       | Assignment                  | Theoretical $m/z$ | Measured $m/z$ | Mass Diff. (ppm) |
|------------------|---------------------------------------------------------|-----------------------------|-------------------|----------------|------------------|
| TFBQ             | $\text{C}_6\text{O}_2\text{F}_4$                        | $\text{M}^-$                | 179.9829          | 179.9832       | 1.6              |
| Hydro-TFBQ       | $\text{C}_6\text{H}_2\text{O}_2\text{F}_4$              | $[\text{M}-\text{H}]^-$     | 180.9907          | 180.9909       | 1.1              |
| Intermediate I   | $\text{C}_6\text{H}_4\text{O}_{12}\text{S}_2\text{F}_4$ | $[\text{M}-2\text{H}]^{2-}$ | 202.9456          | 202.9459       | 1.5              |
| Intermediate II  | $\text{C}_6\text{H}_4\text{O}_{12}\text{S}_2\text{F}_4$ | $[\text{M}-4\text{H}]^{4-}$ | 100.9686          | 100.9688       | 2.0              |
| Intermediate III | $\text{C}_6\text{F}_4\text{O}_4$                        | $\text{M}^-$                | 211.9727          | 211.9730       | 1.4              |
